# Supplementary material for: Embryonic keratin19+ progenitors generate multiple functionally distinct progeny to maintain epithelial diversity in the adult thymus medulla
Source: PubMed Central journal article supplement (PMC10097809; doi:10.1038/s41467-023-37589-4), 2023-04-12
Supplement: 41467_2023_37589_MOESM1_ESM.pdf [file 41467_2023_37589_MOESM1_ESM.pdf]

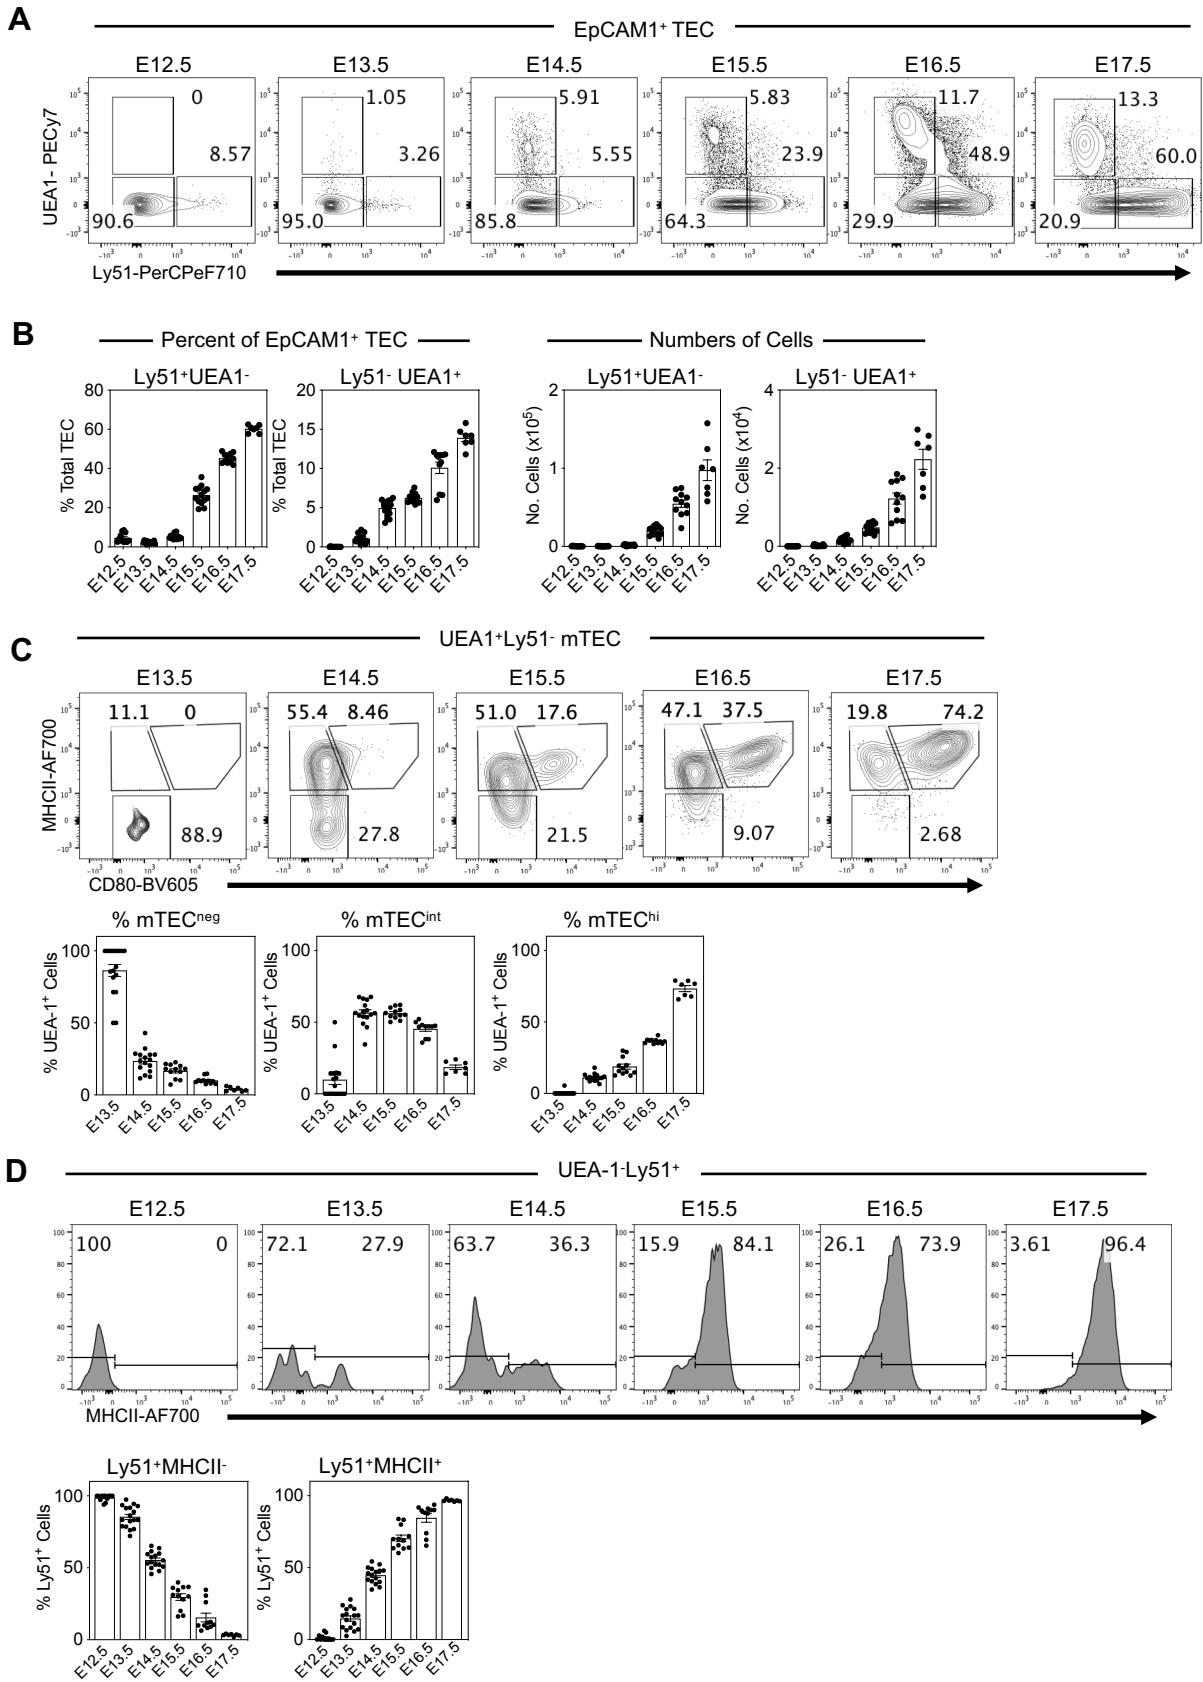

Supplementary Figure 1. Defining Stages in mTEC and cTEC Ontogeny.

**A** Representative FACS plots showing expression of UEA1 and Ly51 by EpCAM1<sup>+</sup> cells during ontogeny.

**B** Quantification of Ly51<sup>+</sup>UEA1<sup>-</sup>, and Ly51<sup>-</sup>UEA1<sup>+</sup> subsets within EpCAM1<sup>+</sup> cells. **C** Representative FACS plots showing expression of MHCII and CD80 by UEA1<sup>+</sup>Ly51<sup>-</sup> mTEC, to identify mTEC<sup>neg</sup> (MHCII<sup>-</sup>CD80<sup>-</sup>), mTEC<sup>int</sup> (MHCII<sup>int</sup>CD80<sup>int</sup>) and mTEC<sup>hi</sup> (MHCII<sup>hi</sup>CD80<sup>hi</sup>), with corresponding quantitation E12.5 n=12, E13.5 n=17, E14.5 n=16, E15.5 n=12, E16.5 n=11, E17.5 n=7. **D** Representative FACS plots showing expression of MHCII by UEA1-Ly51<sup>+</sup> TEC, with corresponding quantitation E12.5 n=12, E13.5 n=17, E14.5 n=16, E15.5 n=12, E16.5 n=11, E17.5 n=7. All data is from 3 independent experiments per gestational age. The data are shown as mean ± SEM.

## Sup. Fig. 2

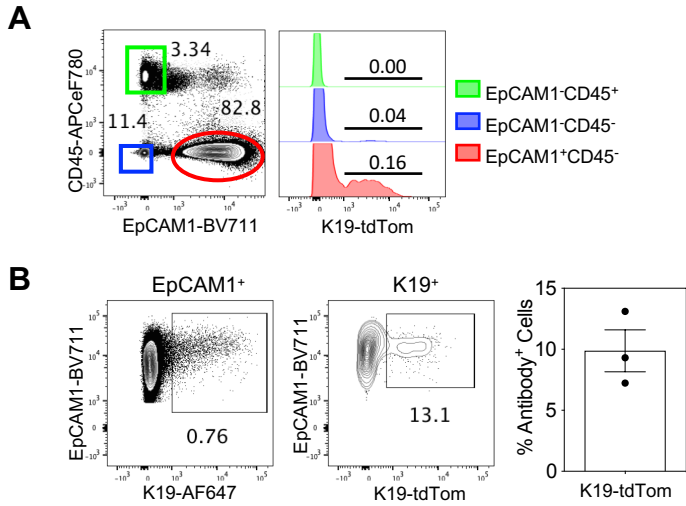

### Supplementary Figure 2. Specificity and efficiency of *Krt19*<sup>ERTCre</sup>

Fate mapping was induced in *Krt19*<sup>ERTCre</sup>tdTom embryos at E15.5 by a single tamoxifen gavage, and embryonic thymi were analysed the following day, n=3. **A** K19-tdTom expression was determined in CD45<sup>+</sup> haematopoietic cells (green), CD45<sup>-</sup>EpCAM<sup>-</sup> cells (blue) and EpCAM1<sup>+</sup> TEC (red) by flow cytometry. **B** Representative FACS plots and quantitation showing expression of K19tdTom within K19-antibody<sup>+</sup> EpCAM1<sup>+</sup> cells. The data are shown as mean ± SEM.

# Sup. Fig. 3

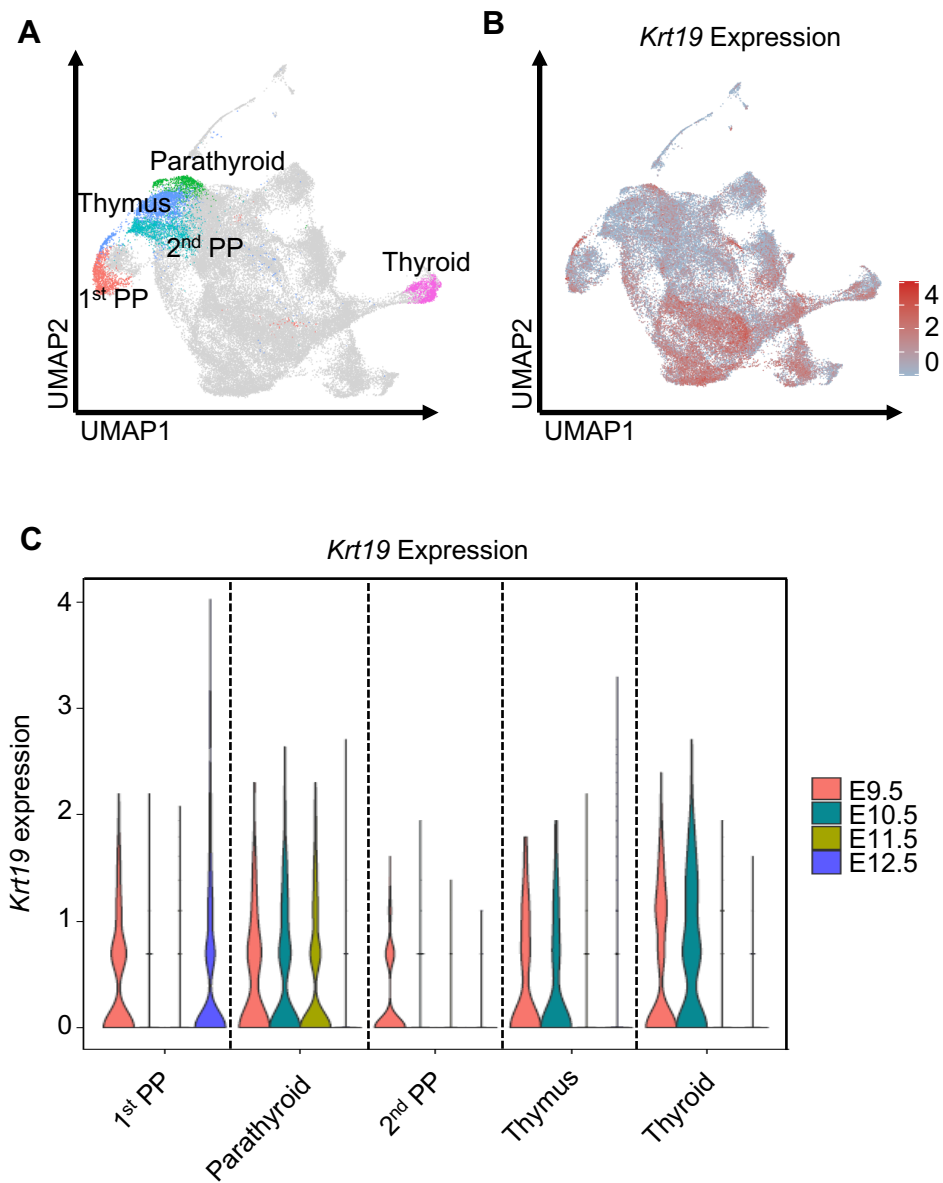

Supplementary Figure 3. *Krt19* expression prior to E12.5

**A** UMAP plot of single cell transcriptomic data of pharyngeal endoderm from E9.5-E12.5 showing clusters which have been annotated using published marker genes (ref - Magaletta et al. 2022). **B** UMAP plot showing *Krt19* expression across the pharyngeal endoderm. **C** Violin plots showing *Krt19* expression within different cell types within the pharyngeal endoderm between E9.5 and E12.5.

Sup. Fig. 4

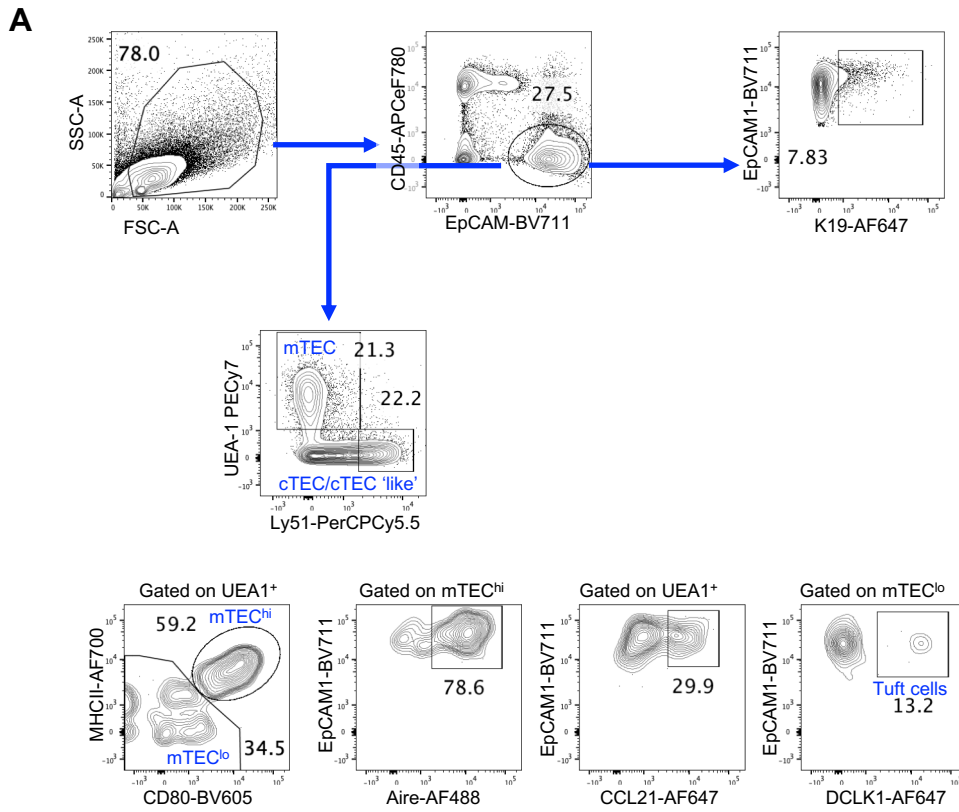

Supplementary Figure 4. Gating strategies used for flow cytometry

**A** Gating for live cells based on FSC/SSC, and identification of EpCAM1<sup>+</sup> thymic epithelial cells (TEC), K19<sup>+</sup> TEC, UEA1<sup>+</sup> mTEC, Ly51<sup>+</sup> cTEC/cTEC 'like', mTEC<sup>lo</sup>, mTEC<sup>hi</sup>, Aire<sup>+</sup> mTEC<sup>hi</sup>, CCL21<sup>+</sup> mTEC, and thymic tuft cells. Gating strategy used in Fig1, 3-9.
